# Supplementary material for: The electronic and optical properties of III–V binary 2D semiconductors: how to achieve high precision from accurate many-body methods
Source: Royal Society of Chemistry journal article supplement (doi:10.1039/d2cp04432c), 2022-01-01
Supplement: d2cp04432c1.pdf [file d2cp04432c1.pdf]

Electronic supplementary information to:

# Electronic and optical properties of III-V binary 2D semiconductors: how to achieve high precision from accurate many-Body methods

Miroslav Kolos and František Karlický\*

Department of Physics, Faculty of Science, University of Ostrava, 30. dubna 22, 701 03 Ostrava, Czech Republic

TABLE S1. Used PAW potentials recommended by VASP[1].

| Element | VASP PAW type | Default cutoff (eV) | No. of explicitly treated electrons |
|---------|---------------|---------------------|-------------------------------------|
| B       | B_GW          | 319                 | 3                                   |
| Al      | Al_GW         | 240                 | 3                                   |
| Ga      | Ga_d_GW       | 404                 | 13                                  |
| N       | N_GW          | 421                 | 5                                   |
| P       | P_GW          | 255                 | 5                                   |
| As      | As_GW         | 209                 | 5                                   |

TABLE S2. Technical settings for the final calculations of seven 2D materials. Super cell size for phonon calculation  $S_{\text{size}}$ , number of bands  $N_{\text{bands}}$ , GW energy cut-off  $E_{\text{cut}}^{\text{GW}}$  in eV, number of frequency grid points in GW/BSE calculation  $N_{\omega}$ , number of k-points in band-gaps calculations  $N_{\text{k-p}}^{\text{gaps}}$ , and number of k points in spectra calculations  $N_{\text{k-p}}^{\text{spec}}$ .

| Material | $S_{\text{size}}$       | $N_{\text{bands}}$ | $E_{\text{cut}}^{\text{GW}}$ | $N_{\omega}$ | $N_{\text{k-p}}^{\text{gaps}}$ | $N_{\text{k-p}}^{\text{spec}}$ |
|----------|-------------------------|--------------------|------------------------------|--------------|--------------------------------|--------------------------------|
| BN       | $11 \times 11 \times 1$ | 1152               | 200                          | 144          | $18 \times 18 \times 1$        | $18 \times 18 \times 1$        |
| BP       | $11 \times 11 \times 1$ | 192                | 150                          | 144          | $24 \times 24 \times 1$        | $30 \times 30 \times 1$        |
| BAs      | $11 \times 11 \times 1$ | 192                | 150                          | 144          | $24 \times 24 \times 1$        | $30 \times 30 \times 1$        |
| AlN      | $11 \times 11 \times 1$ | 1152               | 200                          | 144          | $18 \times 18 \times 1$        | $18 \times 18 \times 1$        |
| GaN      | $9 \times 9 \times 1$   | 1152               | 150                          | 144          | $18 \times 18 \times 1$        | $24 \times 24 \times 1$        |
| GaP      | $11 \times 11 \times 1$ | 768                | 150                          | 144          | $18 \times 18 \times 1$        | $24 \times 24 \times 1$        |
| GaAs     | $13 \times 13 \times 1$ | 768                | 150                          | 144          | $18 \times 18 \times 1$        | $24 \times 24 \times 1$        |

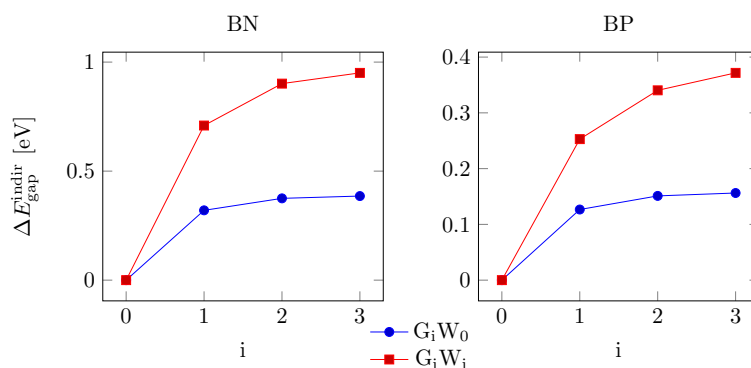

FIG. S1. Convergence of BN and BP band-gaps differences from  $G_0W_0$  in eV with respect to number of iteration  $i$  in  $G_1W_0$  and  $G_1W_i$  calculations.

\* frantisek.karlicky@osu.cz

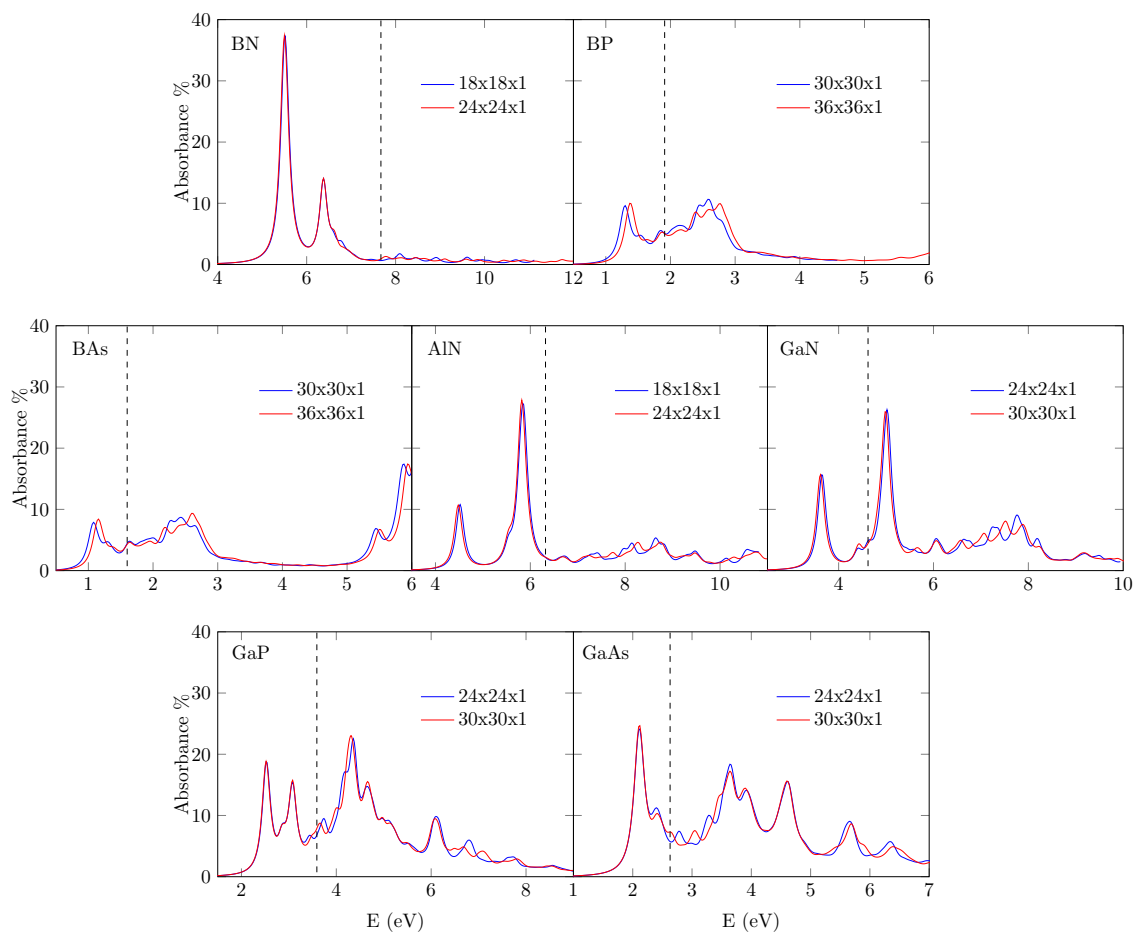

FIG. S2. Absorption spectra of seven 2D materials for different k-point sampling. Smearing width of 0.04 eV was used.

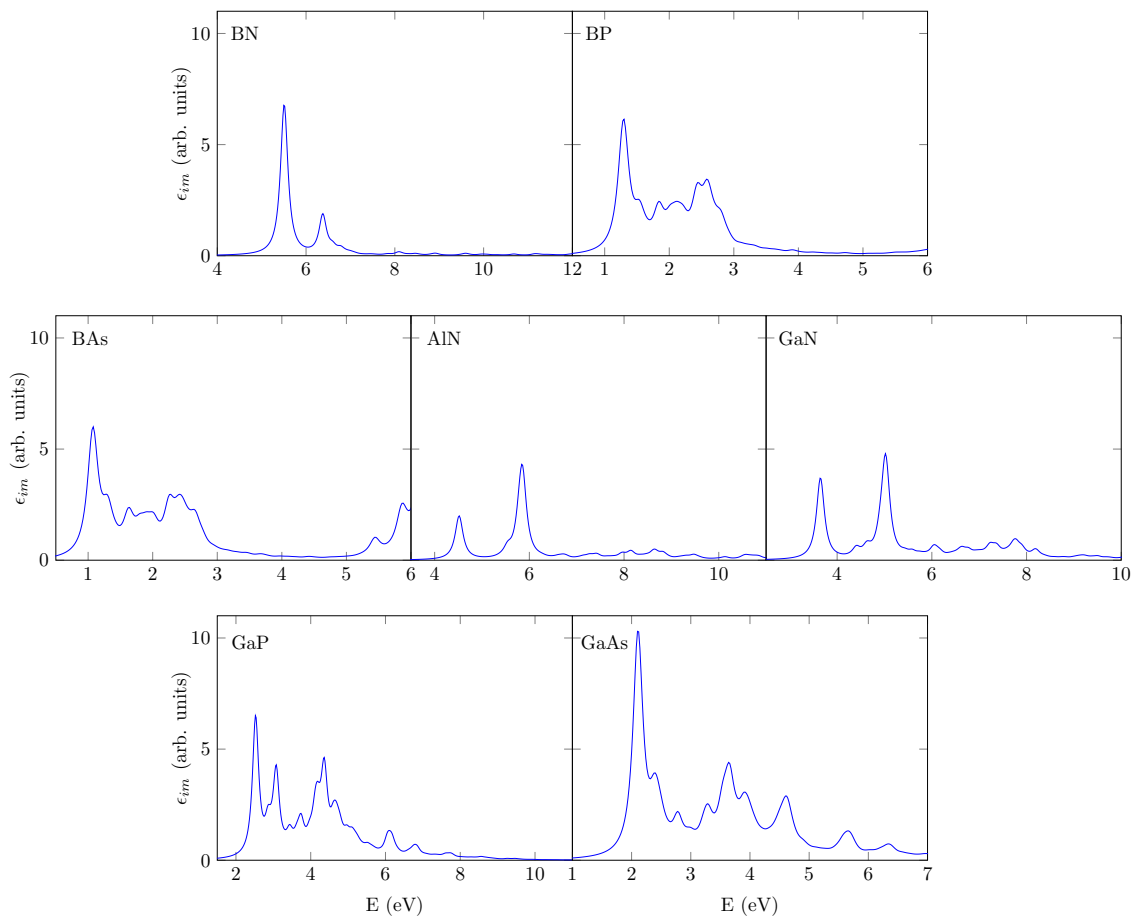

FIG. S3. Imaginary part of the dielectric function of seven 2D materials. Smearing width of 0.04 eV was used.

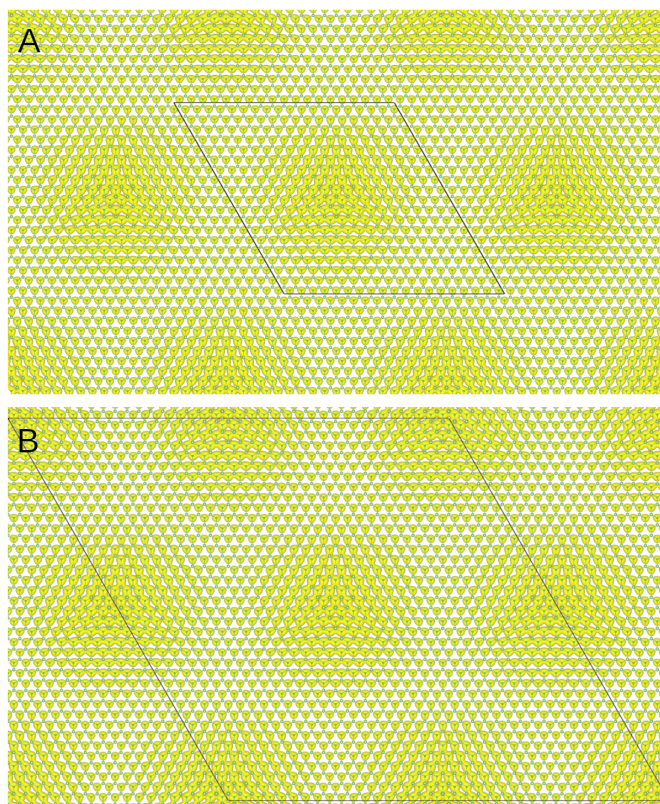

FIG. S4. Isosurface of the first bound exciton with fixed hole for BAs calculated using  $18 \times 18 \times 1$  k-points. The plot uses (A)  $18 \times 18$  and (B)  $36 \times 36$  unit cell sizes in real space.

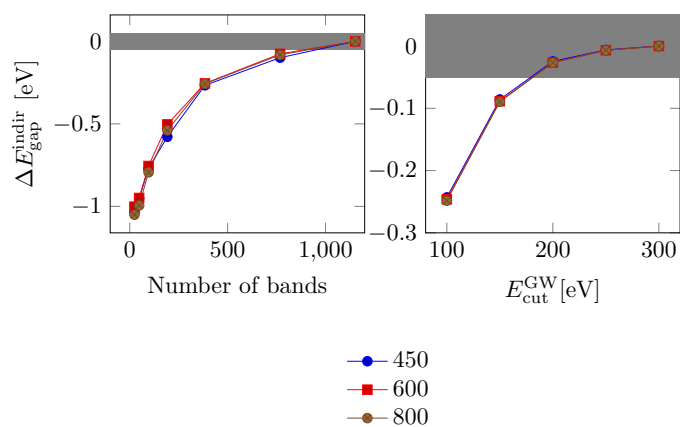

FIG. S5. Indirect gaps of BN as a function of the number of bands in the calculations and GW energy cut-off ( $E_{cut}^{GW}$ ) for different plane-wave cut-offs (in legend).

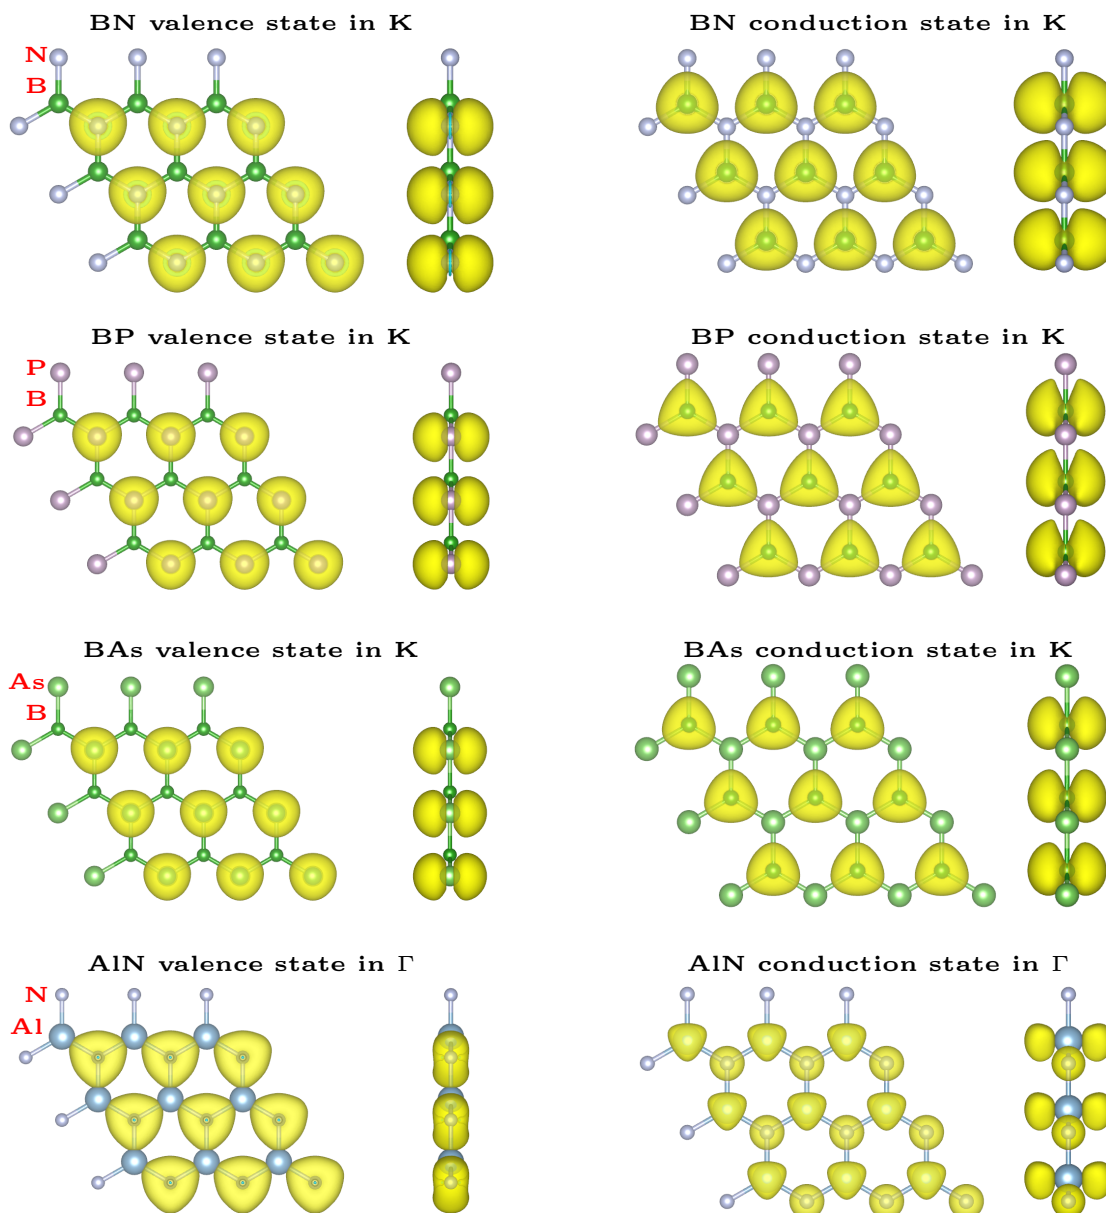

FIG. S6. Partial charges with level of  $0.01 e$  corresponding to the valence and conduction bands at the k point of the direct gap location for BN, BP, BAs and AlN from PBE calculations.

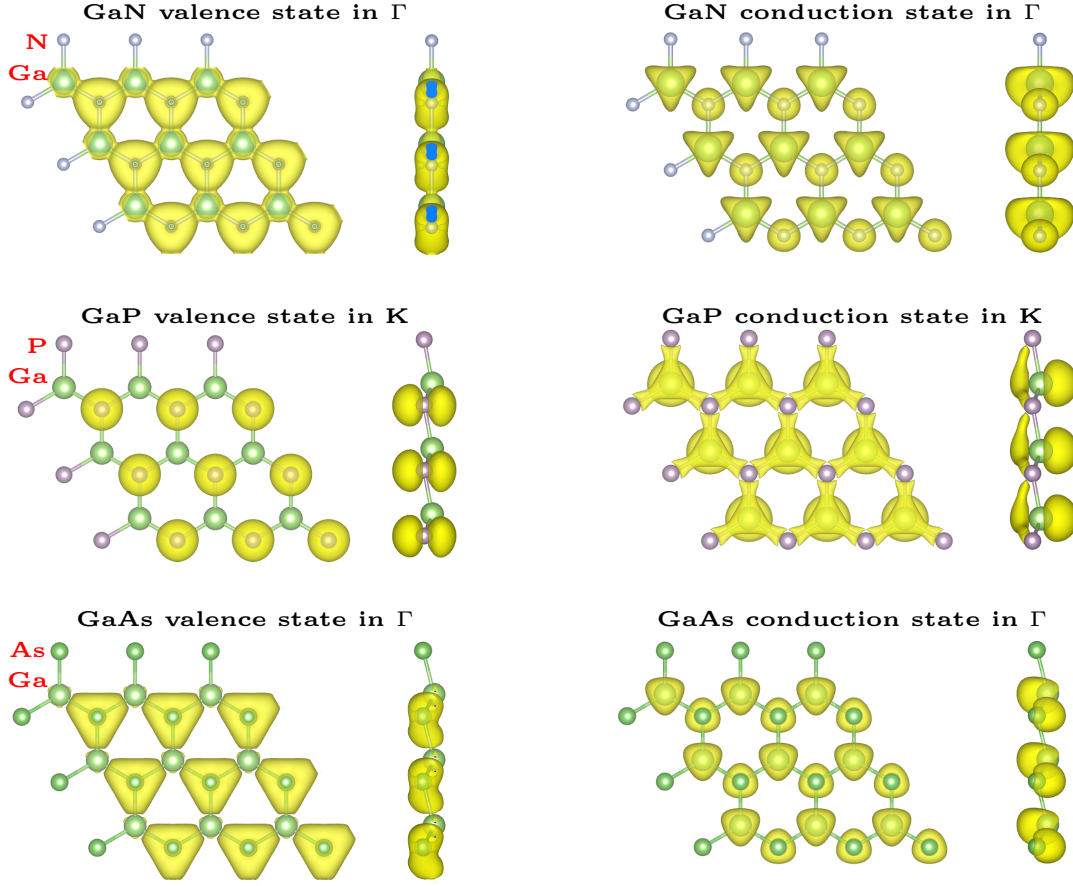

FIG. S7. Partial charges with level of  $0.01 e$  corresponding to the valence and conduction bands at the  $k$  point of the direct gap location for GaN, GaP, and GaAs from PBE calculations.

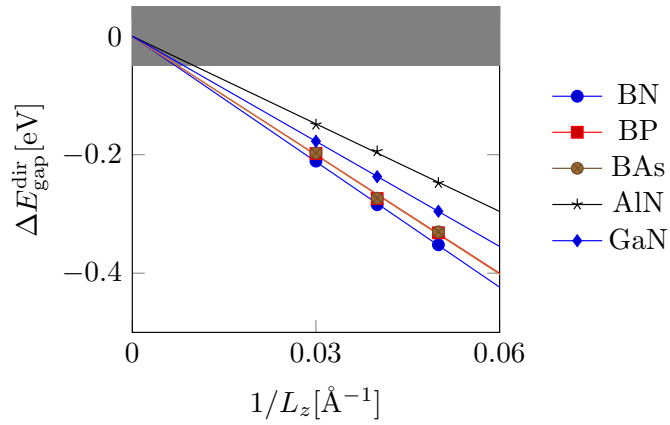

FIG. S8. Representative differences of direct  $G_0W_0$  band-gaps ( $\Delta E_{\text{gap}}^{\text{dir}}$ ) between converged values of five 2D materials and an extrapolated value of  $\Delta E_{\text{gap}}^{\text{dir}}$  (infinite height of computational cell,  $L_z \rightarrow \infty$ ). Grey bars show region within target  $\pm 0.05$  eV threshold.

---

[1] See VASP manual at [https://www.vasp.at/wiki/index.php/Available\\_PAW\\_potentials](https://www.vasp.at/wiki/index.php/Available_PAW_potentials).
